# Supplementary material for: Tailoring tobacco hairy root metabolism for the production of stilbenes
Source: PubMed Central journal article supplement (PMC5740106; doi:10.1038/s41598-017-18330-w), 2017-12-21
Supplement: 41598_2017_18330_MOESM1_ESM.pdf [file 41598_2017_18330_MOESM1_ESM.pdf]

## **Supplementary material:**

### **Tailoring tobacco hairy root metabolism for the production of stilbenes**

Diego Hidalgo, Milen Georgiev, Andrey Marchev, Roque Bru-Martínez, Rosa M.

Cusidó, Purificación Corchete, Javier Palazon

**Table S1.** Sequences of the primers used to amplify the genes by PCR and qPCR

| <b>PCR</b>                                                                                                       |                                                               |                  |                               |
|------------------------------------------------------------------------------------------------------------------|---------------------------------------------------------------|------------------|-------------------------------|
| Gene                                                                                                             | Primer Sequence                                               | Amplicon size bp | Reference                     |
| VvSTS                                                                                                            | FW: ATGGCTTCAGTTGAGGAATTTAGA<br>RV: TTAATTTGTAACCGTAGGAACGCT  | 1179             | Hidalgo et al. <sup>1</sup>   |
| AtMYB12                                                                                                          | FW: CACCATGGGAAGAGCGCCATGTTG<br>RV: TGACAGAAGCCAAGCGACCA      | 1117             | This work                     |
| amiRNA-CHS                                                                                                       | FW: ACGAAGAGGAGATGACGTGTG<br>RV: GTTTTGCCTCGGCCTTTTTCA        | 287              | This work                     |
| rolC                                                                                                             | FW: TAACATGGCTAGAAGACGACC<br>RV: AAAGTTGCACTCGCCATGCC         | 534              | Slightom, et al. <sup>2</sup> |
| virD                                                                                                             | FW: ATGTCGCAAGGCAGTAAGCCCA<br>RV: GGAGTCTTTCAGCATGGAGCAA      | 438              | Hirayama et al. <sup>3</sup>  |
| Program: 95°C for 5 min, 30 cycles (95°C, 60 s; 60°C, 40 s; 72°C, 90 s) and an extension cycle of 10 min at 72°C |                                                               |                  |                               |
| <b>qPCR</b>                                                                                                      |                                                               |                  |                               |
| Elongation factor (qPCR)                                                                                         | FW: TGGTCAGGAGATTGCGAAAGAGC<br>RV: ACGCAAACGCTCCAATGGTG       | 130              | Hidalgo et al. <sup>4</sup>   |
| STS (qPCR)                                                                                                       | FW: AAGGGGAAAAAGCCACCACA<br>RV: TTCGATGGTCAAGCCAGGTC          | 77               | Hidalgo et al. <sup>1</sup>   |
| AtMYB12 (qPCR)                                                                                                   | FW: GAGGCCACGATCGGGAATAG<br>RV: CAGAAGCCAAGCGACCAAAG          | 87               | This work                     |
| amiRNA-CHS (qPCR)                                                                                                | FW: GAGATGACGTGTGTTTCCTTCG<br>RV: GAGGAAGAAGGAGAAGAGAAGGTG    | 73               | This work                     |
| PAL (qPCR)                                                                                                       | FW: TCGAAGATGAATTGAAGGCTGTTTT<br>RV: GGAATAGCAGGGTTTCCACTTTCT | 82               | This work                     |
| CHS (qPCR)                                                                                                       | FW: CAGCCGCGGTCATTATAGGT<br>RV: AGAGTTTGGGCTGCAGAGAC          | 82               | This work                     |
| Program: 95°C for 2 min, 40 cycles (95°C, 10 s; 60°C, 20 s; 72°C, 20 s) followed by a melting curve              |                                                               |                  |                               |

**Table S2.** Analysis of the Pearson linear correlation between the different parameters studied. ccP, Pearson correlation coefficient. TF, transcription factor: PAL, phenylalanine ammonia lyase; CHS, chalcone synthase, TFC, total flavonoids content; Stilb., total stilbenes content.

| <b>Related variable</b> | <b>ccP</b> | <b>p value</b> |
|-------------------------|------------|----------------|
| TF / PAL                | 0.970      | 0.001          |
| TF / CHS                | 0.967      | 0.002          |
| TF / TFC                | 0.882      | 0.020          |
| TF / Stilb.             | 0.888      | 0.018          |
| Inh / CHS               | -0.665     | 0.072          |
| Inh / TFC               | -0.626     | 0.085          |
| CHS / TFC               | 0.858      | 0.001          |
| CHS / TPC               | 0.435      | 0.209          |
| STS / Stilb             | 0.816      | 0.025          |
| TF / TPC                | 0.423      | 0.403          |

**Table S3.** Metabolites identified by relevant spectra (1D and 2D NMR).

| Group of compounds | Metabolite                       | Chemical shift (ppm) | Multiplicity/coupling constant (Hz)                                      |
|--------------------|----------------------------------|----------------------|--------------------------------------------------------------------------|
| Amino acids        | Proline                          | 4.08/2.31            | (dd, $J = 8.6; 6.0$ )/(m)                                                |
|                    | Alanine                          | 1.49                 | (d, $J = 7.2$ )                                                          |
|                    | Glutamine                        | 2.12/2.45            | (m)/(m)                                                                  |
|                    | Leucine                          | 0.96/0.98            | (d, $J = 6.2$ )/(d, $J = 6.4$ )                                          |
|                    | Threonine                        | 1.33                 | (d, $J = 6.8$ )                                                          |
|                    | Valine                           | 1.00/1.01            | (d, $J = 6.6$ )/(d, $J = 7.1$ )                                          |
| Sugar              | $\alpha$ -Glucose                | 5.19                 | (d, $J = 3.7$ )                                                          |
|                    | $\beta$ -Glucose                 | 4.58                 | (d, $J = 7.9$ )                                                          |
|                    | Sucrose                          | 5.41/4.17            | (d, $J = 3.8$ )/(d, $J = 8.6$ )                                          |
| Organic acids      | $\gamma$ -Amino-butyrates (GABA) | 1.9/2.32/3.01        | (m)/(t, $J = 7.5$ )/(t, $J = 7.5$ )                                      |
|                    | Acetic acid                      | 1.94                 | (s)                                                                      |
|                    | Fumaric acid                     | 6.53                 | (s)                                                                      |
|                    | Malic acid                       | 2.82                 | (dd, $J = 16.9; 8.1$ )                                                   |
| Phenolic acids     | Cinnamic acid                    | 7.63/7.42/7.62/6.49  | (m)/(m)/(d, $J = 16$ )/(d, $J = 15.7$ )                                  |
|                    | Caffeic acid                     | 7.12/6.89/7.06       | (d, $J = 2$ )/(d, $J = 8.2$ )/(dd, $J = 8.4; 2$ )                        |
|                    | Sinapic acid                     | 6.93/7.46/6.37/3.88  | (s)/(d, $J = 16$ )/(d, $J = 16$ )/s                                      |
|                    | p-coumaric acid                  | 7.50/6.89/7.59/6.49  | (d, $J = 8.49$ )/(d, $J = 8.2$ )                                         |
| Others             | Inositol                         | 4.08/3.61/3.44/3.25  | (t, $J = 2.82$ )/(t, $J = 9.97$ )/(dd, $J = 10; 1.5?$ )/(t, $J = 9.03$ ) |
|                    | Nicotine                         | 8.69/8.66/8.09/2.76  | (d, $J = 2.0$ )/(dd, $J = 4.8; 1.4$ )/(dt, $J = 4.7; 1.6$ )/(s)          |

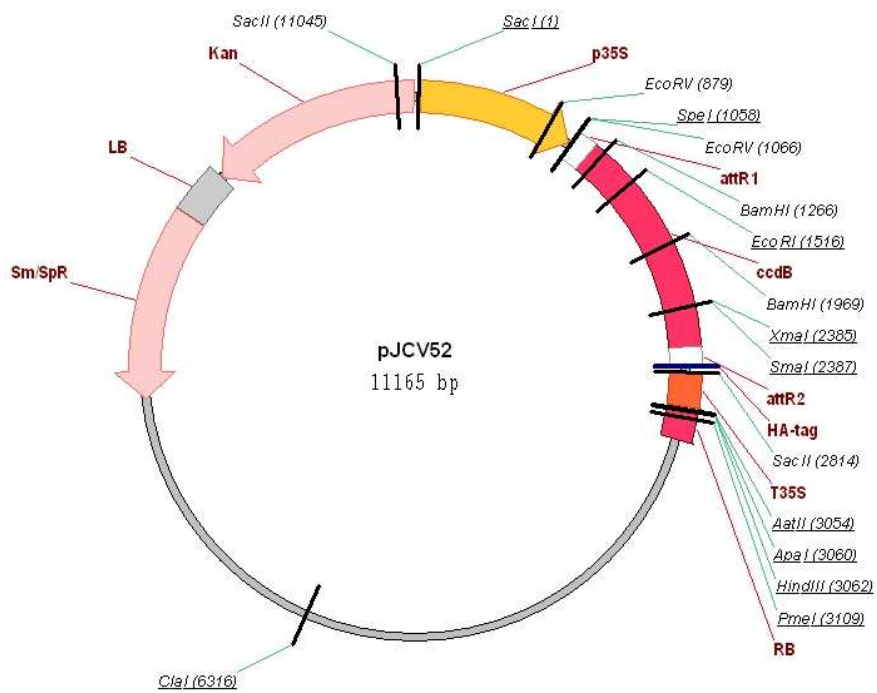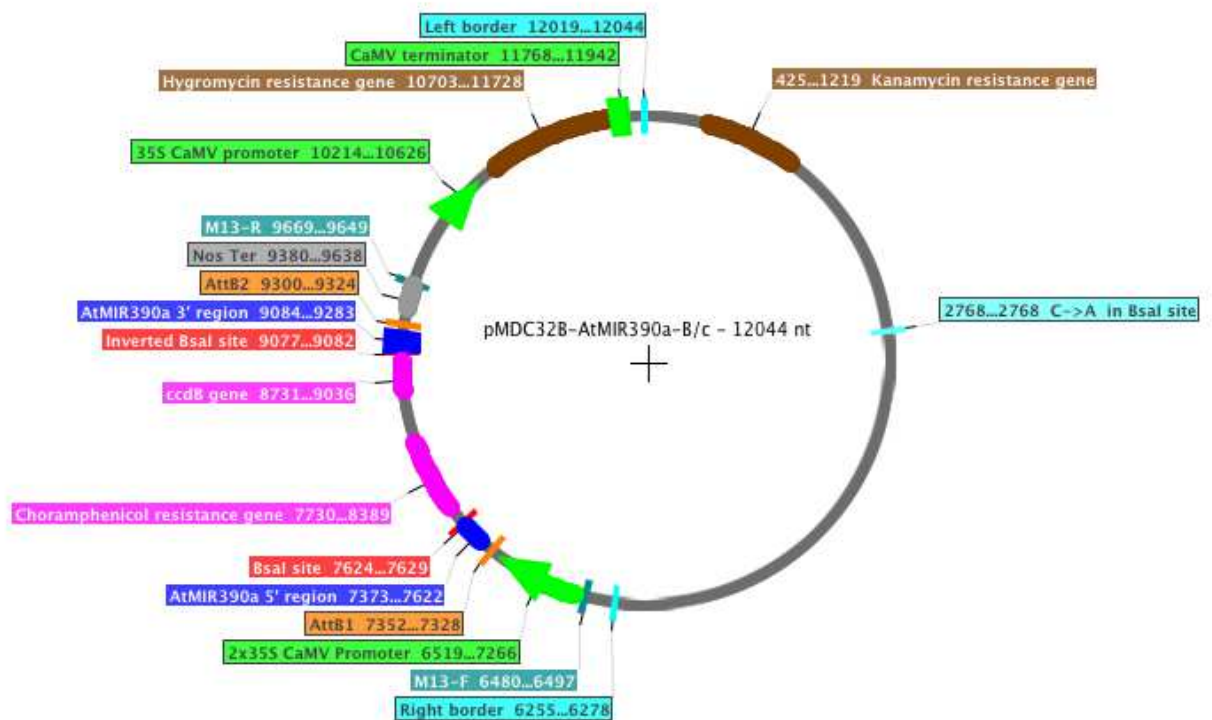

**Fig. S1:** Plant expression vectors pJCV52 by Karimi, et al.<sup>5</sup> and pMDC32B-AtMIR390a-B/c by Carbonell et al.<sup>6</sup>

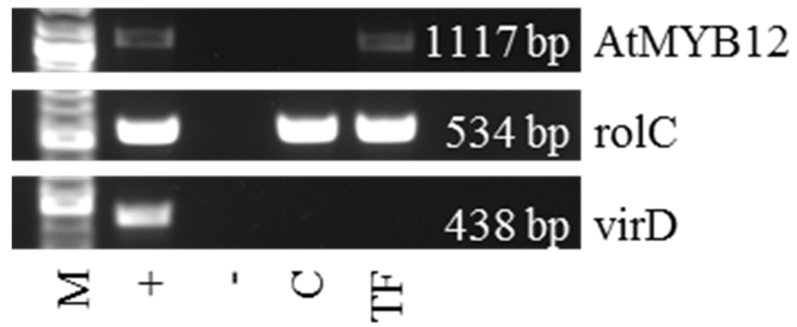

**Fig. S2:** PCR analysis of the genomic DNA of HR lines. (+) positive control (corresponding *A. rhizogenes* used for the infections), (-) negative control (DNA of *Nicotiana tabacum* wild type plant). C, wild type hairy root (control), TF, hairy root line carrying the AtMYB12 transcript

## Supplementary information (1) for the design of amiRNA-CHS.

The amiRNA for *Nicotiana tabaccum* CHS, was designed from the gb|AF311783.1 sequence by the web tool: (<http://p-sams.carringtonlab.org/amiRNA/designer>) as described by Carbonell et al.<sup>6</sup>. The optimal amiRNA CHS sequence result was:

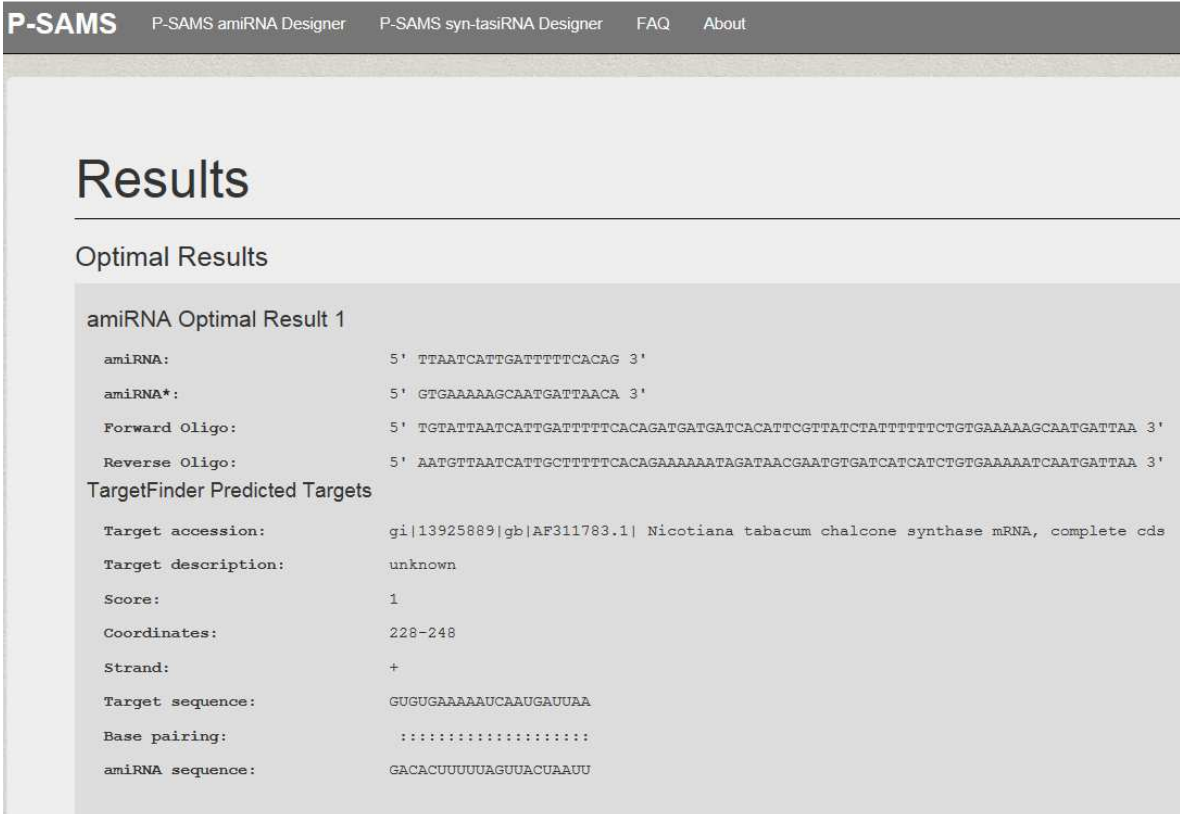

The screenshot shows the 'Results' page of the P-SAMS web tool. The page title is 'Results' and the sub-section is 'Optimal Results'. It displays the 'amiRNA Optimal Result 1' with the following sequences: amiRNA (5' TTAATCATTGATTTTTCACAG 3'), amiRNA\* (5' GTGAAAAAGCAATGATTAACA 3'), Forward Oligo (5' TGTATTAATCATTGATTTTTCACAGATGATGATCACATTCGTTATCTATTTTTCGTGAAAAAGCAATGATTAA 3'), and Reverse Oligo (5' AATGTTAATCATTGCTTTTTCACAGAAAAATAGATAACGAATGTGATCATCATCTGTGAAAAATCAATGATTAA 3'). Below this, it shows 'TargetFinder Predicted Targets' for the target accession gi|13925889|gb|AF311783.1, which is *Nicotiana tabacum* chalcone synthase mRNA, complete cds. The target description is 'unknown', the score is 1, and the coordinates are 228-248. The target sequence is GUGUGAAAAUCAUGAUUAA, the base pairing is shown as a series of dots, and the amiRNA sequence is GACACUUUUUAGUUACUAAUU.

### amiRNA optimal results:

amiRNA: 5' TTAATCATTGATTTTTCACAG 3'

amiRNA\*: 5' GTGAAAAAGCAATGATTAACA 3'

### Forward Oligo: 5'

TGTATTAATCATTGATTTTTCACAGATGATGATCACATTCGTTATCTATTTTTC  
TGTGAAAAAGCAATGATTAA 3'

### Reverse Oligo: 5'

ATGTTAATCATTGCTTTTTCACAGAAAAATAGATAACGAATGTGATCATCATC  
TGTGAAAAATCAATGATTAA 3'

### TargetFinder Predicted Targets

Target accession: gi|13925889|gb|AF311783.1 *Nicotiana tabacum* chalcone synthase mRNA, complete cds

Score: 1

Coordinates: 228-248





**Supplementary information (2). Sequence of *Nicotiana tabacum* chalcone synthase mRNA, complete cds**

>gi|13925889|gb|AF311783.1| *Nicotiana tabacum* chalcone synthase mRNA, complete cds

ATCACTAGCCATTTGAAAACCCTAGTAATCGTCCATCATTTTTTCCGCAAAA  
ATGGTGACCGTCGAGGAATTTTCGTAGGGCGCAATGTGCCGAGGGTCCGGCC  
ACGGTCATGGCTATCGGAACAGCCACACCTTCCAACCTGTGTTGATCAAAGC  
ACTTATCCTGATTATTATTTTCGTATCACTAATAGCGAGCATAAGGTTGAGC  
TTAAGGAAAAATTTAAGCGCATGTGTGAAAAATCAATGATTAAGAAAAGGT  
ACATGCACTTAACAGAGGAAATCTTGAAAGAGAATCCTAATATTTGTGCAT  
ACATGGCACCTTCCCTTGATGCTAGACAAGACATAGTGGTGGTTGAAGTGC  
CAAACCTTGGCAAAGAGGCAGCCAAAAAGCCATCAAAGAATGGGGCCAG  
CCCAAGTCCAAAATTACTCATTTGGTCTTTTGTACAACCTAGTGGTGTAGACA  
TGCCCGGGTGTGACTACCAACTCACTAAGCTACTCGGGCTCCGTCCATCGGT  
CAAGCGGTTTCATGATGTACCAACAAGGTTGCTTTGCCGGTGGCACGGTACTC  
CGGATGGCTAAGGACTTGGCCGAAAACAACAAGGGCGCTCGAGTCCTTGTT  
GTTTGTTTCAGAGATCACCGCTGTCACGTTTCGTGGACCCAATGACACCCACT  
TGGATAGTTTAGTTGGGCAAGCCCTTTTTGGTGTATGGGGCAGCCGCGGTCAT  
TATAGGTTCTGATCCAATTCAGAGGTTCGAGAGGCCTTTGTTTCGAGCTTGTC  
TCTGCAGCCCAAACCTCTTCTCCCGATAGCGAAGGCGCTATCGACGGTCACC  
TTCGTGAAGTTGGGCTTACATTCCACTTACTCAAAGATGTTCCCTGGGCTAAT  
CTCAAAAAACATTGAGAAAAGCCTTGTGGAAGCA  
TTCCAACCTTTGGGAATTTCTGATTGGAACCTTTATTTTGGATTGCTCATCC  
TGGTGGGCCTGCAATTTTGGACCAAGTTGAACTAAAATTGGGCCTAAAGCA  
AGAGAACTAAAGGCTACAAGAAAAGTATTAAGTAACTATGGCAACATGTC  
TAGTGCTTGTGTGTTGTTTATTTTGGATGAAATGAGGAAAGCCTCTGCAAAA  
GAAGGTTTGGGAACCTACTGGTGAAGGGCTTGAATGGGGTGTGCTTTTTGGA  
TTTGGGCCTGGGCTTACAGTTGAGACTGTTGTTCTCCACAGTGTGCTACTT  
AGTGGGCTTGGGCTTATATTGTGGGAAGATTTTAAGTGTTATAATTGTTTAT  
TTTGTTCCTGTGGTTGAATTTATTTTGTGTTGTAATGAATGATTTGCTCTATT  
TTGCTATTTTCATCTTGCAAATAATGAAATTTGTAATGTGAACTATTTAATCA  
AAGAAGTGAATTTCTTTCTCTT

**Supplementary information (3). Sequence of *Vitis vinifera* stilbene synthase clone**

ATGGCTTCAGTTGAGGAATTTAGAAACGCTCAACGTGCCAAGGGTCCGGCCA  
CCATCCTAGCCATTGGCACAGCTACCCCCGACCCTGTGTCTACCAGTCTGAT  
TATGCTGATTACTATTTTCAGGGTCACTAAGAGCGAGCACATGACTGAGTTGAA  
GAAGAAGTTCAATCGCATATGTGACAAATCAATGATCAAGAAGCGTTACATTC  
ACTTGACCGAAGAAATGCTTGAGGAGCACCCAAACATTGGTGCTTATATGGC  
TCCATCTCTTAACATACGCCAAGAGATTATTACTGCTGAGGTACCTAGACTTG  
GTAGGGATGCAGCATTGAAGGCTCTTAAAGAGTGGGGCCAACCAAAGTCCA  
AGATCACCCATCTTGTATTTTGTACAACCTCCGGTGTAGAAATGCCCGGTGCA  
GATTACAAACTCGCTAATCTCTTAGGTCTTGAACATCCGTTAGAAGGGTGAT  
GTTGTACCATCAAGGGTGCTATGCAGGTGGAACCTGTCCTTCGAACTGCTAAG  
GATCTTGCAGAAAATAATGCAGGAGCACGAGTTCTTGTGGTATGCTCTGAGA  
TCACTGTTGTTACATTCCGTGGGCCTTCCGAAGATGCTTTGGACTCTTTAGTT  
GGCCAAGCCCTTTTTGGTGATGGGTCTTCAGCTGTGATTGTTGGATCAGATCC  
AGATGTCTCGATTGAACGACCCTCTTCCAACCTTGTTTCAGCGGCCCAAACA  
TTTATTCCTAATTCAGCAGGAGCCATTGCCGGAACTTACGTGAGGTGGGGCT  
CACTTTTCATTTGTGGCCCAATGTGCCTACTTTGATTTCTGAGAACATAGAGA  
AATGTTTGACCCAGGCTTTTGACCCACTTGGTATTAGCGATTGGAACCTCGTTA  
TTTTGGATTGCTCACCCAGGTGGCCCTGCAATTCTTGATGCAGTTGAAGCAA  
AACTCAATTTAGAGAAAAAGAACTTGAAGCAACAAGGCACGTGTTAAGTG  
AGTATGGTAACATGTCTAGTGCATGTGTGTTGTTTATTTTGGATGAGATGAGA  
AAGAAATCCCTAAAAGGGGAAAAAGCCACCACAGGTGAAGGATTAGATTGG  
GGAGTACTATTTGGTTTTGGACCTGGCTTGACCATCGAAACTGTTGTGCTGCA  
TAGCGTTCCTACGGTTACAAATTA

**Supplementary information (4). Blast result for aligned sequences of VvSTS and NtCHS**

| Score         | Expect | Identities    | Gaps        | Strand    |
|---------------|--------|---------------|-------------|-----------|
| 493 bits(546) | 5e-143 | 820/1170(70%) | 26/1170(2%) | Plus/Plus |

```

Query  62  GTAGAGGACATTAGAAACGCTCAACGTGCCAAGGGTCCGGCCACCATCCTAGCCATTGGC 121
      || |||||  || | |  || ||| ||||| ||||| ||||| || | | || || ||
Sbjct  62  GTCGAGGAATTTTCGTAGGGCGCAATGTGCCGAGGGTCCGGCCACGGTCATGGCTATCGGA 121

Query  122 ACAGCTACTCCCGACCACTGTGTCTACCAGTCTGACTATGCTGATTACTATTTTCAGGGTC 181
      ||||| || ||  | ||||| | ||  || ||||| ||||| ||||| | ||
Sbjct  122 ACAGCCACACCTTCCAACGTGTTGATCAAAGCACTTATCCTGATTATTATTTTCGTATC 181

Query  182 ACTAAGAGCGAGCACATGACTGAGTTGAAGAAGAAATTCATCGCATATGTGACAAATCA 241
      ||||| ||||| | | |||| | ||| | |||| || ||||| ||||| |||||
Sbjct  182 ACTAATAGCGAGCATAAGGTTGAGCTTAAGGAAAAATTTAAGCGCATGTGTGAAAAATCA 241

Query  242 ATGATCAAGAAGCGTTACATTCACTTGACCGAAGAAATGCTTG-AGGAGCACCCAAACAT 300
      ||||| ||||| | ||||| ||||| || || ||||| ||||| | || | || || ||
Sbjct  242 ATGATTAAGAAAAGGTACATGCACTTAACAGAGGAAAT-CTTGAAAGAGAATCCTAATAT 300

Query  301 TGGTGCTTATATGGCTCCATCTCTTAACATACGACAAGAGATTATCACTGCTGAGGTACC 360
      | |||| || ||||| || || ||| |  ||||| || |  | ||| || ||
Sbjct  301 TTGTGCATACATGGCACCTTCCCTTGATGCTAGACAAGACATAGTGGTGGTTGAAGTGCC 360

Query  361 CAAACTTGGTAAAGAAGCAGCATTGAAGGCTCTTAAAGAGTGGGGCCAACCAAAGTCCAA 420
      ||||| ||||| |||||  || || | ||||| ||||| || ||||| ||
Sbjct  361 AAAACTTGGCAAAGAGGCAGCCCAAAAAGCCATCAAAGAATGGGGCCAGCCCAAGTCCAA 420

Query  421 GATCACCCATCTTGTATTTTGTACAACCTCCGGTGTGAAATGCCCGGTGCGGATTACAA 480
      || || ||| | || ||||| |||||  ||||| || ||||| || || || |
Sbjct  421 AATTACTCATTTGGTCTTTTGTACAAC TAGTGGTGTAGACATGCCCGGTGTGACTACCA 480

Query  481 ACTCGCTAATCTCTTAGGTCTCGAAACATCAGTTAGAAGAGTGATGTTGTACCATCAAGG 540
      |||| |||| || | || |||  |||| || |  | ||| ||||| |||||
Sbjct  481 ACTCACTAAGCTACTCGGGCTCCGTCCATCGGTCAAGCGGTTTCATGATGTACCAACAAGG 540

Query  541 GTGCTATGCAGGTGGAACGTGCTCCTCCGAACCGCTAAGGATCTTGAGAGATAATGCAGG 600
      |||| ||| ||||| || || ||||| | ||||| || || || || || ||
Sbjct  541 TTGCTTTGCCGGTGGCACGGTACTCCGGATGGCTAAGGACTTGGCCGAAAAACAACAGGG 600

```

Query 601 AGCACGAGTTCTTGTGGTGTGCTCTGAGATCACTGTTGTTACATTTCTGGGCCTTCCGA 660  
 || ||||| ||||| || || || ||||| | ||| || ||||| | ||| |  
 Sbjct 601 CGCTCGAGTCCTTGTGTTTGTTCAGAGATCACCGCTGTCACGTTTCGTGGAC---CCAA 657

Query 661 AGATGC---TTTGGACTCTTTAGTTGGCCAAGCCCTTTTTGGTGATGGGTCTGCAGCTGT 717  
 || | |||| | ||||| | ||||| ||||| ||||| | ||| |||  
 Sbjct 658 TGACACCCACTTGATAGTTTAGTTGGGCAAGCCCTTTTTGGTGATGGGCAGCCGCGGT 717

Query 718 GATCGTTGGATCGGATCCAGATATCTCA-ATTGAACGACCACTTTTCAGCTCGTCTCAG 776  
 || | || || ||||| || | | | || | || | ||| |||| ||||| |  
 Sbjct 718 CATTATAGGTTCTGATCCA-ATTCCAGAGGTCGAGAGGCCTTTGTTTCGAGCTTGTCTCTG 776

Query 777 CAGCCCAAACGTTTATTCCTAATTCAGCAGGTGCCATTGCCGAAACTTGCCTGAGGTGG 836  
 ||||| || | || || | ||| || || | ||| || | ||||| || |  
 Sbjct 777 CAGCCCAAACCTCTTCTCCCGATAGCGAAGGCGCTATCGACGGTCACCTTCGTGAAGTTG 836

Query 837 GACTCACCTTTTCATTTGTGGCCCA---ATGTGCCTACTTTAATTTCTGAGAACATAGAGA 893  
 | ||| || || || | || | ||| || | ||||| || | ||||| ||||  
 Sbjct 837 GGCTTACATTCCACTT---ACTCAAAGATGTTCTGGGCTAATCTCAAAAAACATTGAGA 893

Query 894 AATG-CTTGACTAAGGCTTTTGACCCACTTGGCATTAGCGATTGGAACCTGTTATTTTGG 952  
 || | |||| || || || | || | || || | ||||| ||||| ||||| ||||  
 Sbjct 894 AAAGCCTTGTGGAA-GCATTCCAACCTTTGGGAATTTCTGATTGGAACCTTTTATTTTGG 952

Query 953 ATTGCTACCCAGGTGGCCCTGCAATTCTCGATGCAGTTGAAGCAAACTCAATTTAGAG 1012  
 ||||| || |||| | ||||| | || | ||||| |||| | || ||  
 Sbjct 953 ATTGCTCATCTGGTGGGCTGCAATTTTGACCAAGTTGAACTAAAATTGGGCCTAAAG 1012

Query 1013 AAAAAGAACTCGAAGCAACTAGGCATGTTTAAAGTGAGTACGGTAACATGTCAAGTGCA 1072  
 || ||||| | || || || | || ||||| | || || ||||| |||||  
 Sbjct 1013 CAAGAGAACTAAAGGCTACAAGAAAAGTATTAAGTAACTATGGCAACATGTCTAGTGCT 1072

Query 1129 TGTGTATTGTTTATTTTGGATGAGATGAGAAAGAAATCCT---CAAAGGGGAAAAGGCT 1129  
 |||| | ||||| ||||| |||| | ||| || | |||| | ||| ||  
 Sbjct 1129 TGTGTGTTGTTTATTTTGGATGAAATGAG---GAAAGCCTCTGCAAAAGAAGGTTTGGGA 1129

Query 1130 ACCACAGGTGAAGGATTGGATTGGGGAGTATTATTTGGTTTTGGGCC-GGGCTTGACCAT 1188  
 || || ||||| | || |||| || | |||| | ||||| ||||| || |

Sbjct 1130 ACTACTGGTGAAGGGCTTGAATGGGGTGTGCTTTTTGGATTGGGCCTGGGCTT-ACAGT  
1188

Query 1189 CGAAACTGTTGTGTTGCATAGCATTCTAC 1218

|| ||||| | || | ||||

Sbjct 1189 TGAGACTGTTGTTCTCCACAGTGTGCTAC 1218

## Unprocessed original scans for all of the blots in figure 2

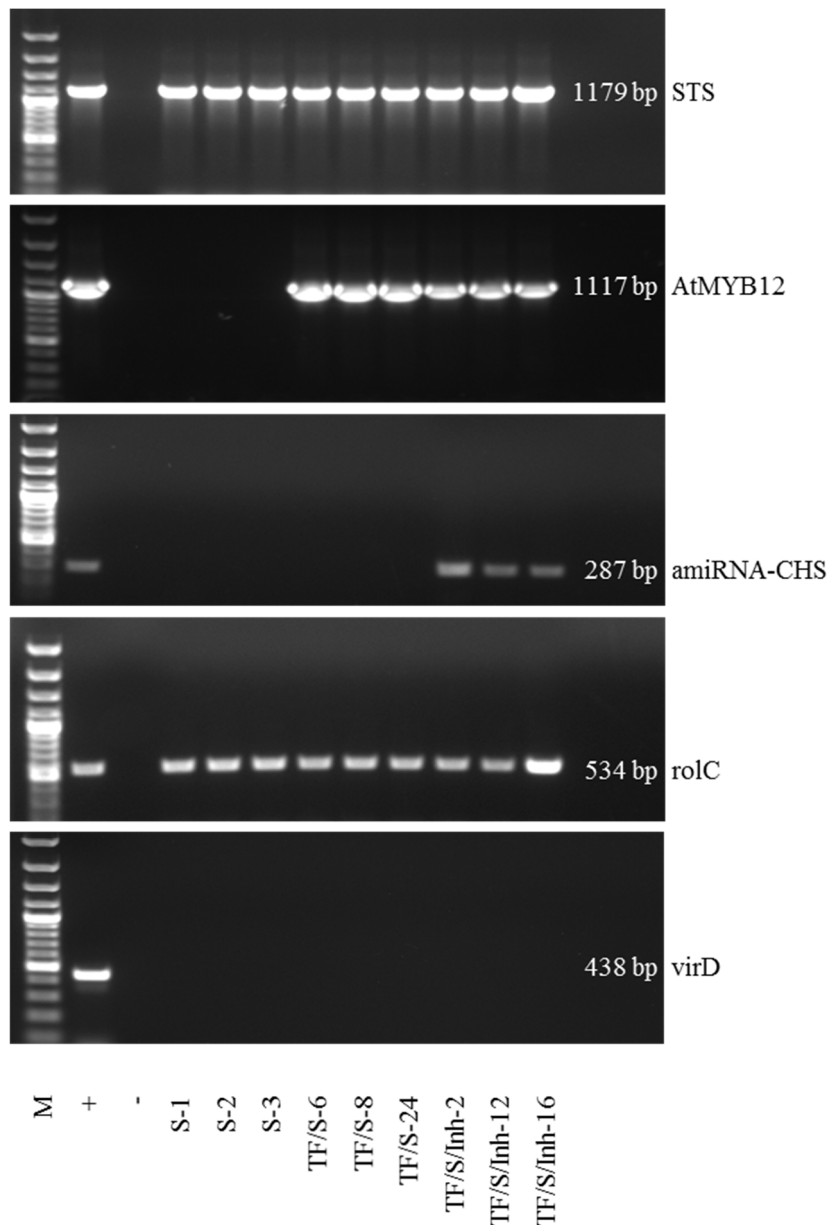

## References

1. Hidalgo, D. *et al.* *Silybum marianum* cell cultures stably transformed with *Vitis vinifera* stilbene synthase accumulate t-resveratrol in the extracellular medium after elicitation with methyl jasmonate or methylated  $\beta$ -cyclodextrins. *Eng. Life Sci.* **17**, 686-694 (2017)
2. Slightom, J.L., Durand-Tardif, M., Jouanin, L. and Tepfer, D. Nucleotide sequence analysis of TL-DNA of *Agrobacterium rhizogenes* agropine type plasmid. *J. Biol. Chem.* **261**, 108-121 (1986).

3. Hirayama, T., Muranaka, T., Ohkawa, H. and Oka, A. Organization and characterization of the *virCD* genes from *Agrobacterium rhizogenes*. *Mol. Gen. Genet.* **213**, 229-237 (1988).
4. Hidalgo, D., *et al.* Bioconversion of stilbenes in genetically engineered root and cell cultures of tobacco. *Sci Rep.* **27**, 7:45331 (2017).
5. Karimi, M., Inzé, D. and Depicker, A. Gateway vectors for *Agrobacterium*-mediated plant transformation. *Trends Plant Sci.* **7**(5), 193-195 (2002).
6. Carbonell, A. *et al.* New Generation of Artificial MicroRNA and Synthetic Trans-Acting Small Interfering RNA Vectors for Efficient Gene Silencing in *Arabidopsis*. *Plant Physiol.* **165**(1):15-29 (2014).
